# Supplementary material
Source: Springer Nature journal article supplement (https://www.springermedizin.de/resource/supplementary/12885_2014_4959_MOESM8_ESM.pdf/9467818)
Supplement: MOESM8 [file 9467818]

**Table S6.** Eighty-six CpG units showing area under the curve (AUC) values larger than 0.9 in receiver operating characteristic curve analysis for discrimination of CpG island methylator phenotype (CIMP)-positive clear cell renal cell carcinomas (ccRCCs) from CIMP-negative ccRCCs in the learning cohort.

| ID of CpG unit | Gene symbol | Chromosome | Position of CpG site <sup>a</sup>          | AUC value |
|----------------|-------------|------------|--------------------------------------------|-----------|
| 1              | FAM150A     | 8          | 58478309                                   | 0.936     |
| 2              | FAM150A     | 8          | 58478316, 58478323                         | 0.947     |
| 3              | FAM150A     | 8          | 58478361, 58478363, 58478366               | 0.912     |
| 5              | FAM150A     | 8          | 58478396, 58478403                         | 0.945     |
| 7              | FAM150A     | 8          | 58478426, 58478428                         | 0.934     |
| 8              | FAM150A     | 8          | 58478477                                   | 0.968     |
| 9              | FAM150A     | 8          | 58478496, 58478499                         | 0.939     |
| 10             | FAM150A     | 8          | 58478504                                   | 0.911     |
| 11             | FAM150A     | 8          | 58478511                                   | 0.968     |
| 12             | FAM150A     | 8          | 58478536                                   | 0.925     |
| 14             | FAM150A     | 8          | 58478585, 58478588, 58478592               | 0.912     |
| 16             | FAM150A     | 8          | 58478624, 58478626                         | 0.939     |
| 18             | GRM6        | 5          | 178422320, 178422324                       | 0.903     |
| 19             | GRM6        | 5          | 178422375, 178422380                       | 0.931     |
| 21             | ZFP42       | 4          | 188916875                                  | 0.917     |
| 22             | ZFP42       | 4          | 188916899                                  | 0.933     |
| 23             | ZFP42       | 4          | 188916913                                  | 0.928     |
| 25             | ZFP42       | 4          | 188916982, 188916984                       | 0.932     |
| 28             | ZNF540      | 19         | 38042472, 38042474                         | 0.928     |
| 30             | ZNF540      | 19         | 38042496                                   | 0.983     |
| 32             | ZNF540      | 19         | 38042518                                   | 0.960     |
| 33             | ZNF540      | 19         | 38042530, 38042532                         | 0.991     |
| 34             | ZNF540      | 19         | 38042544, 38042552                         | 0.927     |
| 36             | ZNF540      | 19         | 38042576                                   | 0.920     |
| 41             | ZNF540      | 19         | 38042800, 38042802                         | 0.941     |
| 42             | ZNF540      | 19         | 38042816                                   | 0.928     |
| 43             | ZNF154      | 19         | 58220567                                   | 0.956     |
| 44             | ZNF154      | 19         | 58220627                                   | 0.966     |
| 45             | ZNF154      | 19         | 58220657, 58220662                         | 0.959     |
| 46             | ZNF154      | 19         | 58220706                                   | 0.912     |
| 48             | ZNF154      | 19         | 58220766, 58220773                         | 0.917     |
| 56             | RIMS4       | 20         | 43438576                                   | 0.913     |
| 58             | RIMS4       | 20         | 43438621                                   | 0.914     |
| 74             | PRAC        | 17         | 46799645, 46799648                         | 0.943     |
| 75             | PRAC        | 17         | 46799654                                   | 0.915     |
| 77             | PRAC        | 17         | 46799745                                   | 0.944     |
| 78             | PRAC        | 17         | 46799755                                   | 0.957     |
| 79             | TRH         | 3          | 129693350, 129693352, 129693355, 129693358 | 0.903     |
| 81             | TRH         | 3          | 129693406, 129693412                       | 0.973     |
| 82             | TRH         | 3          | 129693425                                  | 0.917     |
| 83             | TRH         | 3          | 129693500                                  | 0.902     |
| 85             | TRH         | 3          | 129693518, 129693521, 129693528            | 0.950     |
| 86             | TRH         | 3          | 129693540, 129693543                       | 0.943     |
| 87             | TRH         | 3          | 129693563                                  | 0.902     |
| 88             | TRH         | 3          | 129693570, 129693574                       | 0.935     |

|     |         |    |                                    |       |
|-----|---------|----|------------------------------------|-------|
| 89  | TRH     | 3  | 129693586                          | 0.952 |
| 90  | TRH     | 3  | 129693607                          | 0.917 |
| 91  | TRH     | 3  | 129693613                          | 0.921 |
| 93  | TRH     | 3  | 129693628                          | 0.943 |
| 94  | TRH     | 3  | 129693635                          | 0.967 |
| 95  | TRH     | 3  | 129693672                          | 0.925 |
| 99  | SLC13A5 | 17 | 6616653, 6616655, 6616657          | 0.940 |
| 101 | SLC13A5 | 17 | 6616702, 6616705, 6616707          | 0.906 |
| 102 | SLC13A5 | 17 | 6616733                            | 0.983 |
| 103 | SLC13A5 | 17 | 6616751                            | 0.928 |
| 104 | SLC13A5 | 17 | 6616763, 6616768                   | 0.946 |
| 105 | SLC13A5 | 17 | 6616812                            | 0.983 |
| 106 | SLC13A5 | 17 | 6616826, 6616828                   | 0.951 |
| 107 | SLC13A5 | 17 | 6616851, 6616854, 6616857          | 0.954 |
| 110 | SLC13A5 | 17 | 6616927, 6616929                   | 0.951 |
| 112 | SLC13A5 | 17 | 6616968, 6616973                   | 0.927 |
| 114 | SLC13A5 | 17 | 6617030, 6617038, 6617040, 6617044 | 0.942 |
| 115 | SLC13A5 | 17 | 6617077                            | 0.927 |
| 116 | SLC13A5 | 17 | 6617124                            | 0.930 |
| 118 | SLC13A5 | 17 | 6617251, 6617255                   | 0.916 |
| 119 | SLC13A5 | 17 | 6617287, 6617291                   | 0.931 |
| 120 | SLC13A5 | 17 | 6617300, 6617305                   | 0.930 |
| 124 | SLC13A5 | 17 | 6617382                            | 0.942 |
| 126 | SLC13A5 | 17 | 6617398, 6617402, 6617405          | 0.936 |
| 127 | SLC13A5 | 17 | 6617415                            | 0.908 |
| 128 | SLC13A5 | 17 | 6617421, 6617423                   | 0.927 |
| 130 | SLC13A5 | 17 | 6617466, 6617470                   | 0.935 |
| 135 | SLC13A5 | 17 | 6617595, 6617597                   | 0.942 |
| 138 | ZNF671  | 19 | 58238740                           | 0.906 |
| 141 | ZNF671  | 19 | 58238780                           | 0.954 |
| 143 | ZNF671  | 19 | 58238810                           | 0.926 |
| 147 | ZNF671  | 19 | 58238850                           | 0.927 |
| 150 | ZNF671  | 19 | 58238928                           | 0.965 |
| 152 | ZNF671  | 19 | 58238954                           | 0.954 |
| 153 | ZNF671  | 19 | 58238987                           | 0.954 |
| 155 | ZNF671  | 19 | 58239012                           | 0.951 |
| 156 | ZNF671  | 19 | 58239027                           | 0.910 |
| 160 | WNT3A   | 1  | 228195688                          | 0.943 |
| 161 | WNT3A   | 1  | 228195722                          | 0.943 |
| 162 | WNT3A   | 1  | 228195779                          | 0.943 |
| 184 | ASCL2   | 11 | 2292542, 2292544                   | 0.907 |

---

<sup>a</sup>National Center for Biotechnology Information (NCBI) Database (Genome Build 37).
